# Supplementary material
Source: PubMed Central journal article supplement (PMC4374054)
Supplement: NIHMS657401-supplement-Supplementary_Materials__figures__tables.pdf [file NIHMS657401-supplement-Supplementary_Materials__figures__tables.pdf]

Table 4: Endpoint: Pain level  $\geq 2$ . Association of demographic and clinical characteristics with incident neuropathic pain. Univariable analysis using logistic mixed-effects regression. N=567 subjects, 2734 visits.

|                                                    | Group        | OR      | 95% CI            | LRT P-value |
|----------------------------------------------------|--------------|---------|-------------------|-------------|
| Age                                                | per yr       | 1.058   | (1.019, 1.098)    | 0.0025      |
| Gender                                             | Women        | Ref     |                   | 0.18        |
|                                                    | Men          | 0.60    | (0.29, 1.27)      |             |
| Ethnicity                                          | White        | Ref     |                   | 0.095       |
|                                                    | Black        | 0.46    | (0.24, 0.89)      |             |
|                                                    | Hispanic     | 0.46    | (0.15, 1.44)      |             |
|                                                    | Other        | 0.33    | (0.04, 2.88)      |             |
| CART Use at Study Entry                            | Never        | Ref     |                   | 0.16        |
|                                                    | Current      | 2.21    | (0.941, 5.17)     |             |
|                                                    | Past         | 2.31    | (0.73, 7.32)      |             |
| Current CART Use                                   | Never        | Ref     |                   | 0.22        |
|                                                    | Current      | 2.30    | (0.86, 6.11)      |             |
|                                                    | Past         | 2.03    | (0.67, 6.15)      |             |
| D-drug Use                                         | Never        | Ref     |                   | 0.064       |
|                                                    | Current      | 0.77    | (0.24, 2.45)      |             |
|                                                    | Past         | 1.84    | (0.986, 3.45)     |             |
| Current CD4 < 200                                  | $\geq 200$   | Ref     |                   | 0.85        |
|                                                    | < 200        | 0.937   | (0.47, 1.87)      |             |
| Nadir CD4 < 200                                    | $\geq 200$   | Ref     |                   | 0.32        |
|                                                    | < 200        | 1.34    | (0.75, 2.38)      |             |
| Plasma HIV VL at Study Entry                       | Undetectable | Ref     |                   | 0.88        |
|                                                    | Detectable   | 0.951   | (0.51, 1.79)      |             |
| Time-updated Detectable Plasma HIV VL              | Undetectable | Ref     |                   | 0.89        |
|                                                    | Detectable   | 0.971   | (0.64, 1.47)      |             |
| HIV Duration                                       | per month    | 1.0034  | (0.99928, 1.0075) | 0.10        |
| Hepatitis C Serostatus                             | Negative     | Ref     |                   | 0.14        |
|                                                    | Positive     | 1.62    | (0.86, 3.08)      |             |
| Diabetes Mellitus                                  | No DM2       | Ref     |                   | 0.55        |
|                                                    | DM2          | 0.70    | (0.21, 2.33)      |             |
| Triglycerides                                      | per unit     | 1.00033 | (0.9964, 1.0043)  | 0.87        |
| Time-updated Depressive Symptoms (BDI-II)          | 0-13         | Ref     |                   | 0.0034      |
|                                                    | 14-19        | 1.17    | (0.66, 2.08)      |             |
|                                                    | 20-28        | 2.14    | (1.20, 3.82)      |             |
|                                                    | 29-63        | 3.55    | (1.71, 7.41)      |             |
| Lifetime History of Any Substance Abuse/Dependence | No           | Ref     |                   | 0.50        |
|                                                    | Yes          | 1.27    | (0.63, 2.53)      |             |
| Alcohol: History of Ab/Dep                         | No           | Ref     |                   | 0.37        |
|                                                    | Yes          | 1.33    | (0.71, 2.47)      |             |
| Methamphetamine: History of Ab/Dep                 | No           | Ref     |                   | 0.98        |
|                                                    | Yes          | 1.011   | (0.45, 2.29)      |             |
| Cocaine: History of Ab/Dep                         | No           | Ref     |                   | 0.35        |
|                                                    | Yes          | 1.35    | (0.72, 2.52)      |             |
| Opioids: History of Ab/Dep                         | No           | Ref     |                   | 0.040       |
|                                                    | Yes          | 2.31    | (1.047, 5.08)     |             |

Table 5: Endpoint: Pain level  $\geq 2$ . Association of demographic and clinical characteristics with incident neuropathic pain. Univariable analysis using logistic mixed-effects regression: variables showing interaction with follow-up time.

|                                             | Group             | Effect at 1 year: OR (95% CI) | Yearly Change: OR (95% CI) | Interacti |
|---------------------------------------------|-------------------|-------------------------------|----------------------------|-----------|
| CD4 < 200 at Study Entry                    | $\geq 200$        | Ref                           | 1.25 (1.105, 1.40)         | 0.014     |
|                                             | < 200             | 1.43 (0.57, 3.61)             | 0.88 (0.68, 1.14)          |           |
| Height                                      | 66in (25th %-ile) | 1.34 (1.037, 1.72)            | 1.062 (0.934, 1.21)        | 0.0042    |
|                                             | 69in (50th %-ile) | Ref                           | 1.21 (1.086, 1.36)         |           |
|                                             | 71in (75th %-ile) | 0.82 (0.70, 0.976)            | 1.33 (1.15, 1.52)          |           |
| Depressive Symptoms at Study Entry (BDI-II) | 0-13              | Ref                           | 1.36 (1.17, 1.57)          | 0.0050    |
|                                             | 14-19             | 2.65 (1.015, 6.93)            | 1.16 (0.89, 1.53)          |           |
|                                             | 20-28             | 2.62 (1.033, 6.63)            | 0.930 (0.71, 1.22)         |           |
|                                             | 29-63             | 3.45 ( 1.16, 10.29)           | 0.79 (0.56, 1.097)         |           |

Table 6: Subjects without DSPN at baseline. Endpoint: Pain level  $\geq 2$ . Multivariable logistic mixed-effects regression model for incident neuropathic pain  $\geq 2$  and symptoms. N=567 subjects, 2734 visits.

|                                    | Group     | OR (95% CI)          | P-value |
|------------------------------------|-----------|----------------------|---------|
| Follow-up Time                     | per yr    | 1.13 (1.0064, 1.27)  | 0.034   |
| Age                                | per yr    | 1.054 (1.015, 1.095) | 0.0054  |
| Time-updated Depr. Sympt. (BDI-II) | 0-13      | Ref                  | 0.0013  |
|                                    | 14-19     | 1.20 (0.67, 2.15)    |         |
|                                    | 20-28     | 2.16 (1.20, 3.89)    |         |
|                                    | 29-63     | 3.43 (1.64, 7.15)    |         |
| Opioid use                         | Yes vs No | 2.35 (1.055, 5.21)   | 0.039   |

Table 7: Subjects without DSPN at baseline. Endpoint: Signs + Symptoms, Pain level  $\geq 1$ . Association of demographic and clinical characteristics with incident DSPN. Univariable analysis using logistic mixed-effects regression. N=532 subjects, 2572 visits.

|                                                    | Group                                     | OR     | 95% CI            | LRT P-value |
|----------------------------------------------------|-------------------------------------------|--------|-------------------|-------------|
| Age                                                | per yr                                    | 1.069  | (1.028, 1.11)     | 0.00064     |
| Gender                                             | Women                                     | Ref    |                   | 0.048       |
|                                                    | Men                                       | 0.47   | (0.22, 0.9933)    |             |
| Ethnicity                                          | White                                     | Ref    |                   | 0.95        |
|                                                    | Black                                     | 0.86   | (0.43, 1.70)      |             |
|                                                    | Hispanic                                  | 1.042  | (0.35, 3.07)      |             |
|                                                    | Other                                     | 1.25   | (0.20, 7.98)      |             |
| CART Use at Study Entry                            | Never                                     | Ref    |                   | 0.0041      |
|                                                    | Current                                   | 3.73   | (1.49, 9.33)      |             |
|                                                    | Past                                      | 5.91   | (1.79, 19.57)     |             |
| D-drug Use                                         | Never                                     | Ref    |                   | 0.0026      |
|                                                    | Current                                   | 2.04   | (0.69, 6.07)      |             |
|                                                    | Past                                      | 3.09   | (1.61, 5.95)      |             |
| Current CD4 < 200                                  | $\geq 200$                                | Ref    |                   | 0.20        |
|                                                    | < 200                                     | 1.52   | (0.81, 2.87)      |             |
| Nadir CD4 < 200                                    | $\geq 200$                                | Ref    |                   | 0.021       |
|                                                    | < 200                                     | 2.08   | (1.105, 3.91)     |             |
| Plasma HIV VL at Study Entry                       | Undetectable                              | Ref    |                   | 0.84        |
|                                                    | Detectable                                | 0.935  | (0.49, 1.78)      |             |
| Time-updated Detectable Plasma HIV VL              | Undetectable                              | Ref    |                   | 0.81        |
|                                                    | Detectable                                | 1.053  | (0.70, 1.59)      |             |
| HIV Duration                                       | per month                                 | 1.0048 | (1.00049, 1.0091) | 0.027       |
| Hepatitis C Serostatus                             | Negative                                  | Ref    |                   | 0.041       |
|                                                    | Positive                                  | 1.99   | (1.029, 3.83)     |             |
| Diabetes Mellitus                                  | No DM2                                    | Ref    |                   | 0.53        |
|                                                    | DM2                                       | 1.43   | (0.48, 4.27)      |             |
| Triglycerides                                      | per unit                                  | 0.9985 | (0.9945, 1.0026)  | 0.48        |
| Depressive Symptoms at Study Entry (BDI-II)        | 0-13                                      | Ref    |                   | 0.087       |
|                                                    | 14-19                                     | 2.00   | (0.77, 5.17)      |             |
|                                                    | 20-28                                     | 2.69   | (1.15, 6.31)      |             |
|                                                    | 29-63                                     | 0.90   | (0.27, 2.94)      |             |
|                                                    | Time-updated Depressive Symptoms (BDI-II) | 0-13   | Ref               |             |
|                                                    | 14-19                                     | 1.92   | (1.11, 3.34)      |             |
|                                                    | 20-28                                     | 2.17   | (1.15, 4.07)      |             |
|                                                    | 29-63                                     | 2.81   | (1.25, 6.31)      |             |
| Lifetime History of Any Substance Abuse/Dependence | No                                        | Ref    |                   | 0.30        |
|                                                    | Yes                                       | 1.46   | (0.72, 2.96)      |             |
| Alcohol: History of Ab/Dep                         | No                                        | Ref    |                   | 0.41        |
|                                                    | Yes                                       | 1.31   | (0.69, 2.47)      |             |
| Methamphetamine: History of Ab/Dep                 | No                                        | Ref    |                   | 0.70        |
|                                                    | Yes                                       | 0.85   | (0.37, 1.96)      |             |
| Cocaine: History of Ab/Dep                         | No                                        | Ref    |                   | 0.091       |
|                                                    | Yes                                       | 1.74   | (0.915, 3.30)     |             |
| Opioids: History of Ab/Dep                         | No                                        | Ref    |                   | 0.014       |
|                                                    | Yes                                       | 2.75   | (1.24, 6.14)      |             |

Table 8: Endpoint: Signs + Pain level  $\geq 1$ . Association of demographic and clinical characteristics with incident neuropathic pain. Univariable analysis using logistic mixed-effects regression: variables showing interaction with follow-up time.

|                          | Group             | Effect at 1 year: OR (95% CI) | Yearly Change: OR (95% CI) | Interaction P-value |
|--------------------------|-------------------|-------------------------------|----------------------------|---------------------|
| Current CART Use         | Never             | Ref                           | 2.73 (1.32, 5.64)          | 0.018               |
|                          | Current           | 16.96 (2.92, 98.37)           | 1.060 (0.944, 1.19)        |                     |
|                          | Past              | 23.58 (3.72, 149.52)          | 0.88 (0.60, 1.30)          |                     |
| CD4 < 200 at Study Entry | $\geq 200$        | Ref                           | 1.17 (1.029, 1.32)         | 0.038               |
|                          | < 200             | 2.96 (1.26, 7.00)             | 0.90 (0.72, 1.11)          |                     |
| Height                   | 66in (25th %-ile) | 1.33 (1.036, 1.71)            | 0.9975 (0.87, 1.14)        | 0.033               |
|                          | 69in (50th %-ile) | Ref                           | 1.098 (0.982, 1.23)        |                     |
|                          | 71in (75th %-ile) | 0.83 (0.70, 0.977)            | 1.17 (1.028, 1.33)         |                     |
|                          |                   |                               |                            |                     |

Table 9: Subjects without DSPN at baseline. Endpoint: signs + symptoms, pain level  $\geq 1$ . Multivariable logistic mixed-effects regression model for incident neuropathic pain  $\geq 1$  and symptoms. N=532 subjects, 2572 visits.

|                                    | Group                | OR (95% CI)         | P-value |
|------------------------------------|----------------------|---------------------|---------|
| Follow-up Time                     | per yr               | 0.9921 (0.88, 1.12) | 1.00    |
| Age                                | per yr               | 1.067 (1.027, 1.11) | 0.0018  |
| Gender                             | Male vs Female       | 0.46 (0.22, 0.933)  | 0.072   |
| CART (Time-updated)                | Never                | Ref                 | 0.0041  |
|                                    | Current              | 5.22 ( 1.51, 18.07) |         |
|                                    | Past                 | 6.47 ( 1.70, 24.67) |         |
| CD4 < 200 at Study Entry           | $\leq 200$ vs $>200$ | 1.80 (0.82, 3.93)   | 0.16    |
| Time-updated Depr. Sympt. (BDI-II) | 0-13                 | Ref                 | 0.0017  |
|                                    | 14-19                | 2.10 (1.21, 3.65)   |         |
|                                    | 20-28                | 2.32 (1.24, 4.36)   |         |
|                                    | 29-63                | 2.47 (1.11, 5.52)   |         |
| Opioid use                         | Yes vs No            | 2.03 (0.938, 4.39)  | 0.054   |

Table 10: Subjects without DSPN at baseline. Endpoint: signs + symptoms, pain level  $\geq 2$ . Association of demographic and clinical characteristics with incident neuropathic pain  $\geq 2$  and symptoms. Univariable analysis using logistic mixed-effects regression. N=579 subjects, 2866 visits.

|                                                    | Group        | OR     | 95% CI            | LRT P-value |
|----------------------------------------------------|--------------|--------|-------------------|-------------|
| Age                                                | per yr       | 1.093  | (1.044, 1.14)     | <0.0001     |
| Ethnicity                                          | White        | Ref    |                   | 0.41        |
|                                                    | Black        | 0.53   | (0.25, 1.13)      |             |
|                                                    | Hispanic     | 0.57   | (0.16, 2.06)      |             |
|                                                    | Other        | 0.65   | (0.06, 6.44)      |             |
| CART Use at Study Entry                            | Never        | Ref    |                   | 0.11        |
|                                                    | Current      | 2.47   | (0.919, 6.65)     |             |
|                                                    | Past         | 1.18   | (0.29, 4.82)      |             |
| Current CART Use                                   | Never        | Ref    |                   | 0.067       |
|                                                    | Current      | 4.06   | ( 1.12, 14.70)    |             |
|                                                    | Past         | 3.57   | ( 0.84, 15.17)    |             |
| D-drug Use                                         | Never        | Ref    |                   | 0.037       |
|                                                    | Current      | 1.33   | (0.38, 4.68)      |             |
|                                                    | Past         | 2.48   | (1.19, 5.18)      |             |
| Current CD4 < 200                                  | $\geq 200$   | Ref    |                   | 0.52        |
| Nadir CD4 < 200                                    | < 200        | 1.27   | (0.61, 2.65)      |             |
|                                                    | $\geq 200$   | Ref    |                   | 0.076       |
| Plasma HIV VL at Study Entry                       | < 200        | 1.85   | (0.929, 3.69)     |             |
|                                                    | Undetectable | Ref    |                   | 0.53        |
| Time-updated Detectable Plasma HIV VL              | Detectable   | 0.80   | (0.39, 1.62)      |             |
|                                                    | Undetectable | Ref    |                   | 0.17        |
| HIV Duration                                       | per month    | 1.0050 | (1.00021, 1.0098) | 0.038       |
| Hepatitis C Serostatus                             | Negative     | Ref    |                   | 0.095       |
|                                                    | Positive     | 1.85   | (0.90, 3.80)      |             |
| Diabetes Mellitus                                  | No DM2       | Ref    |                   | 0.88        |
|                                                    | DM2          | 0.90   | (0.23, 3.45)      |             |
| Triglycerides                                      | per unit     | 1.0021 | (0.9975, 1.0067)  | 0.37        |
| Time-updated Depressive Symptoms (BDI-II)          | 0-13         | Ref    |                   | 0.072       |
|                                                    | 14-19        | 1.11   | (0.60, 2.06)      |             |
|                                                    | 20-28        | 1.75   | (0.89, 3.42)      |             |
|                                                    | 29-63        | 3.02   | (1.26, 7.27)      |             |
| Lifetime History of Any Substance Abuse/Dependence | No           | Ref    |                   | 0.76        |
|                                                    | Yes          | 1.13   | (0.52, 2.47)      |             |
| Alcohol: History of Ab/Dep                         | No           | Ref    |                   | 0.97        |
|                                                    | Yes          | 1.015  | (0.50, 2.06)      |             |
| Methamphetamine: History of Ab/Dep                 | No           | Ref    |                   | 0.68        |
|                                                    | Yes          | 0.82   | (0.31, 2.15)      |             |
| Cocaine: History of Ab/Dep                         | No           | Ref    |                   | 0.32        |
|                                                    | Yes          | 1.44   | (0.70, 2.96)      |             |
| Opioids: History of Ab/Dep                         | No           | Ref    |                   | 0.041       |
|                                                    | Yes          | 2.59   | (1.054, 6.35)     |             |
| Height                                             | per inch     | 0.958  | (0.88, 1.048)     | 0.34        |

Table 11: Endpoint: Signs + Pain level  $\geq 2$ . Association of demographic and clinical characteristics with incident neuropathic pain. Univariable analysis using logistic mixed-effects regression: variables showing interaction with follow-up time.

|                                             | Group      | Effect at 1 year: OR (95% CI) | Yearly Change: OR (95% CI) | Interaction P-value |
|---------------------------------------------|------------|-------------------------------|----------------------------|---------------------|
| Gender                                      | Female     | Ref                           | 0.977 (0.73, 1.31)         | 0.043               |
|                                             | Male       | 0.53 (0.21, 1.31)             | 1.36 (1.19, 1.54)          |                     |
| CD4 < 200 at Study Entry                    | $\geq 200$ | Ref                           | 1.42 (1.24, 1.63)          | 0.0031              |
|                                             | < 200      | 2.13 (0.75, 6.05)             | 0.932 (0.73, 1.19)         |                     |
| Depressive Symptoms at Study Entry (BDI-II) | 0-13       | Ref                           | 1.37 (1.18, 1.60)          | 0.035               |
|                                             | 14-19      | 1.90 (0.62, 5.76)             | 1.38 (1.016, 1.88)         |                     |
|                                             | 20-28      | 1.79 (0.61, 5.22)             | 1.26 (0.923, 1.72)         |                     |
|                                             | 29-63      | 2.88 (0.82, 10.13)            | 0.73 (0.48, 1.12)          |                     |

Table 12: Subjects without DSPN at baseline. Endpoint: signs + symptoms, pain level  $\geq 2$ . Multivariable logistic mixed-effects regression model for incident neuropathic pain  $\geq 2$  and symptoms. N=579 subjects, 2866 visits.

|                  | Group     | OR (95% CI)         | P-value |
|------------------|-----------|---------------------|---------|
| Follow-up Time   | per yr    | 1.14 (1.0061, 1.30) | 0.040   |
| Age              | per yr    | 1.091 (1.042, 1.14) | 1e-04   |
| Current CART Use | Never     | Ref                 | 0.066   |
|                  | Current   | 4.49 (1.12, 18.02)  |         |
|                  | Past      | 3.95 (0.84, 18.51)  |         |
| Opioid use       | Yes vs No | 1.091 (1.042, 1.14) | 0.050   |
